SHORT COMMUNICATION  
ULTRASTRUCTURAL EVIDENCE FOR GABAERGIC INPUT  
ONTO CERCAL AFFERENTS IN THE LOCUST  
(*LOCUSTA MIGRATORIA*)

By A. H. D. WATSON\*

*Research School of Biological Sciences, Australian National University,  
PO Box 475, Canberra City, ACT 2601, Australia*

*Accepted 8 September 1989*

Ultrastructural studies have revealed input synapses on the central terminals of many sensory afferent neurones in both vertebrates (Maxwell *et al.* 1982; Ralston *et al.* 1984) and invertebrates (Altman *et al.* 1980; Watson and Pflüger, 1984). Indeed presynaptic modulation of sensory information flowing into the central nervous system appears to be a very widespread phenomenon. It may take the form of either inhibition (Eccles, 1964) or facilitation (Klein and Kandel, 1980), but it is the former that is most widely known from physiological experiments. Several mechanisms can bring about presynaptic inhibition. (1) Depolarization of an afferent terminal may reduce the amplitude of the action potential, leading to a reduction of the calcium influx and, consequently, of transmitter release (Miledi and Slater, 1966; Blagburn and Sattelle, 1987). (2) A conductance increase in the terminal may reduce the height of an action potential regardless of the direction of the potential change (Baxter and Bittner, 1981; Hue and Callec, 1983) and block spike conduction through small-diameter axonal branches (Atwood, 1976). The most widely suggested mechanism for this in both vertebrates (Nicholl and Alger, 1979) and invertebrates (Kennedy *et al.* 1980) is an increase in chloride conductance mediated by GABA. (3) The presynaptic calcium current may be reduced by the direct action of a neurotransmitter (Shapiro *et al.* 1980).

In the insect nervous system the sensory afferents of cercal hairs have proved important for the study of presynaptic inhibition. The cerci project posteriorly from the last segment of the abdomen and are covered with sensory hairs. Filiform hairs are very sensitive to air currents and even to low-frequency sound (Plummer and Camhi, 1981; Kämper, 1984). Their afferents run into the terminal ganglion where they synapse with giant interneurones that ascend the ventral nerve cord (Shankland and Goodman, 1982; Boyan *et al.* 1986). Wind stimuli to the cerci can initiate running, jumping or flying in various insects as part of escape behaviour (Huber, 1965; Camhi *et al.* 1978; Boyan *et al.* 1986). For the sensory input evoking

\* Present address: Department of Anatomy, University of Wales College of Cardiff, PO Box 900, Cardiff CF1 3YE.

such vital behaviour to be interpreted unambiguously, it is necessary that hair displacement brought about by air currents is distinguishable from that caused by movement of the cercus. In the locust, filiform afferents are inhibited by presynaptic depolarization during passive displacement of the cercus (Boyan, 1988). This is thought to be evoked by the activity of a stretch receptor at the base of the cercus acting *via* an unidentified interneurone. In the cricket, sensory hair afferents are also presynaptically inhibited by the activity of other afferents belonging to hairs with different directional sensitivity (Levine and Murphey, 1980). This sharpens the directional sensitivity of the giant interneurons and guides the escape response in an appropriate direction. A similar interaction between cercal afferents occurs in first-instar cockroach nymphs (Blagburn and Sattelle, 1987).

The insect terminal ganglion contains numerous neurones immunoreactive for GABA (Jacobs *et al.* 1985; Watson and Pflüger, 1988; Bernard and Thomas, 1988) and this transmitter appears to mediate at least some of the presynaptic inhibition of the cercal afferents (Hue and Callec, 1983). In vertebrates, immunocytochemistry has been used in conjunction with anterograde degeneration (Barber *et al.* 1978) or intracellular staining (Maxwell and Noble, 1987) to demonstrate that sensory afferent terminals receive inputs from processes that are labelled with antibodies against glutamate decarboxylase, the enzyme that catalyses the synthesis of GABA. No comparable investigations have been carried out on invertebrates.

The objectives of the present study are twofold. (1) To demonstrate that filiform hair afferents in the locust receive presynaptic input. (2) To discover whether some or all of the presynaptic neurones are immunoreactive for GABA.

Adult locusts (*Locusta migratoria*) from a crowded culture at the Australian National University were restrained and the cerci immobilized with cyanoacrylic glue. A Vaseline well was made around hairs on the lateral face of the cercus and filled with distilled water. Four to six long filiform hairs were cut at their bases and the water replaced with 5% horseradish peroxidase (HRP) (Sigma type VI) in  $0.2 \text{ mol l}^{-1}$  Tris buffer (pH 8.0). The well was sealed with Vaseline and the insects kept in a moist atmosphere at  $4^\circ\text{C}$  for 4 days followed by 2 days at room temperature. Terminal ganglia were then fixed *in situ* for 5 min in 5% glutaraldehyde in  $0.05 \text{ mol l}^{-1}$  phosphate buffer (pH 7.4) containing 6.8 g of sucrose per 100 ml. After excision they were further fixed for 2 h and reacted with diaminobenzidine (DAB) according to the method of Watson and Burrows (1981). Briefly, after washing in phosphate and Tris buffer, the ganglia were immersed in  $0.5 \text{ mol l}^{-1}$   $\text{CoCl}_2$  in Tris buffer and after further washing incubated for 1 h at  $37^\circ\text{C}$  in 10 ml of phosphate buffer containing DAB (5 mg),  $\beta$ -D-glucose (20 mg), ammonium chloride (4 mg) and glucose oxidase (Sigma type V, 6 units). The ganglia were fixed in  $\text{OsO}_4$ , block-stained with uranyl acetate, dehydrated in alcohol and embedded in L.R. White resin. Ultrathin sections through the afferent terminals were picked up on pioloform-coated nickel slot grids and stained using antibodies against GABA (Sera Laboratories) in an immunogold procedure (see

Watson, 1988, for details). Unetched sections were washed and floated on droplets of 5% goat serum in Tris buffer for 30 min, primary antiserum (1/800) for 2 h, washed again and transferred to 15 nm gold-labelled goat antirabbit antiserum (Janssen, 1:15) for 1 h. After further washing the grids were contrasted with uranyl acetate and lead citrate. The immunogold labelling could be abolished by preabsorption of the primary antiserum with a GABA-BSA conjugate (see Watson, 1988).

Ultrastructural examination of sections through the terminals of the filiform hair afferents reveals numerous synapses upon them from processes containing small agranular synaptic vesicles (Fig. 1). Some processes presynaptic to the afferent terminals show immunogold labelling (Fig. 1A,C) though this is quite light compared with processes in ganglia of control animals, possibly due to the effects of the prolonged immobilization at low temperatures required for the backfills or to the histochemical processing of the HRP. Because of the lightness of labelling, a statistical test was used to demonstrate that immunoreactive processes could be clearly distinguished from background labelling. Gold particles over 16 immunoreactive processes were counted and their density calculated per unit area. For comparison, particles were counted in 16  $1\text{-}\mu\text{m}^2$  areas taken at random from the same micrographs. The density of particles in immunoreactive processes was  $42.4 \pm 14.0 \mu\text{m}^{-2}$  (mean  $\pm$  standard deviation) which is significantly greater ( $P < 0.001$ , unpaired *t*-test) than background levels ( $7.1 \pm 2.73 \mu\text{m}^{-2}$ ). Labelling was highly consistent from section to section, as can be seen by comparison of two non-adjacent sections (Fig. 1A,B).

The vesicles in the immunoreactive presynaptic processes have a diameter of approximately 32–40 nm. Some of the non-immunoreactive neuropilar processes (including the one presynaptic to the hair afferent in Fig. 1D) contain vesicles that are larger, being about 37–53 nm in diameter. This is consistent with ultrastructural observations of GABA-immunoreactive processes in the thoracic ganglia of *Schistocerca*, in which vesicles were smaller than those in unlabelled processes (Watson, 1988). Flattened agranular vesicles have often been taken as indicators of the presence of GABA (Uchizono, 1965, 1967). However, vesicle shape can vary according to the tonicity of the fixative (Tisdale and Nakajima, 1976) and it will be noted that in this preparation the larger agranular vesicles in the unlabelled processes of Fig. 1C also exhibit some flattening. Furthermore, it has recently been reported that, even within the same tissue, GABA-immunoreactive processes may differ in their vesicle content (Hamori and Takacs, 1989), demonstrating the importance of immunocytochemical support for the nature of the transmitter.

The presence of non-immunoreactive inputs (Fig. 1D) onto the terminals suggests that at least two presynaptic effects may be experienced by the afferents. There is some physiological support for this. Hue and Callec (1983) have presented evidence for a presynaptic inhibition of cercal afferents in the adult cockroach that can be blocked by picrotoxin or low-chloride saline. Using a mannitol gap technique on the cercal nerve they also demonstrated that GABA

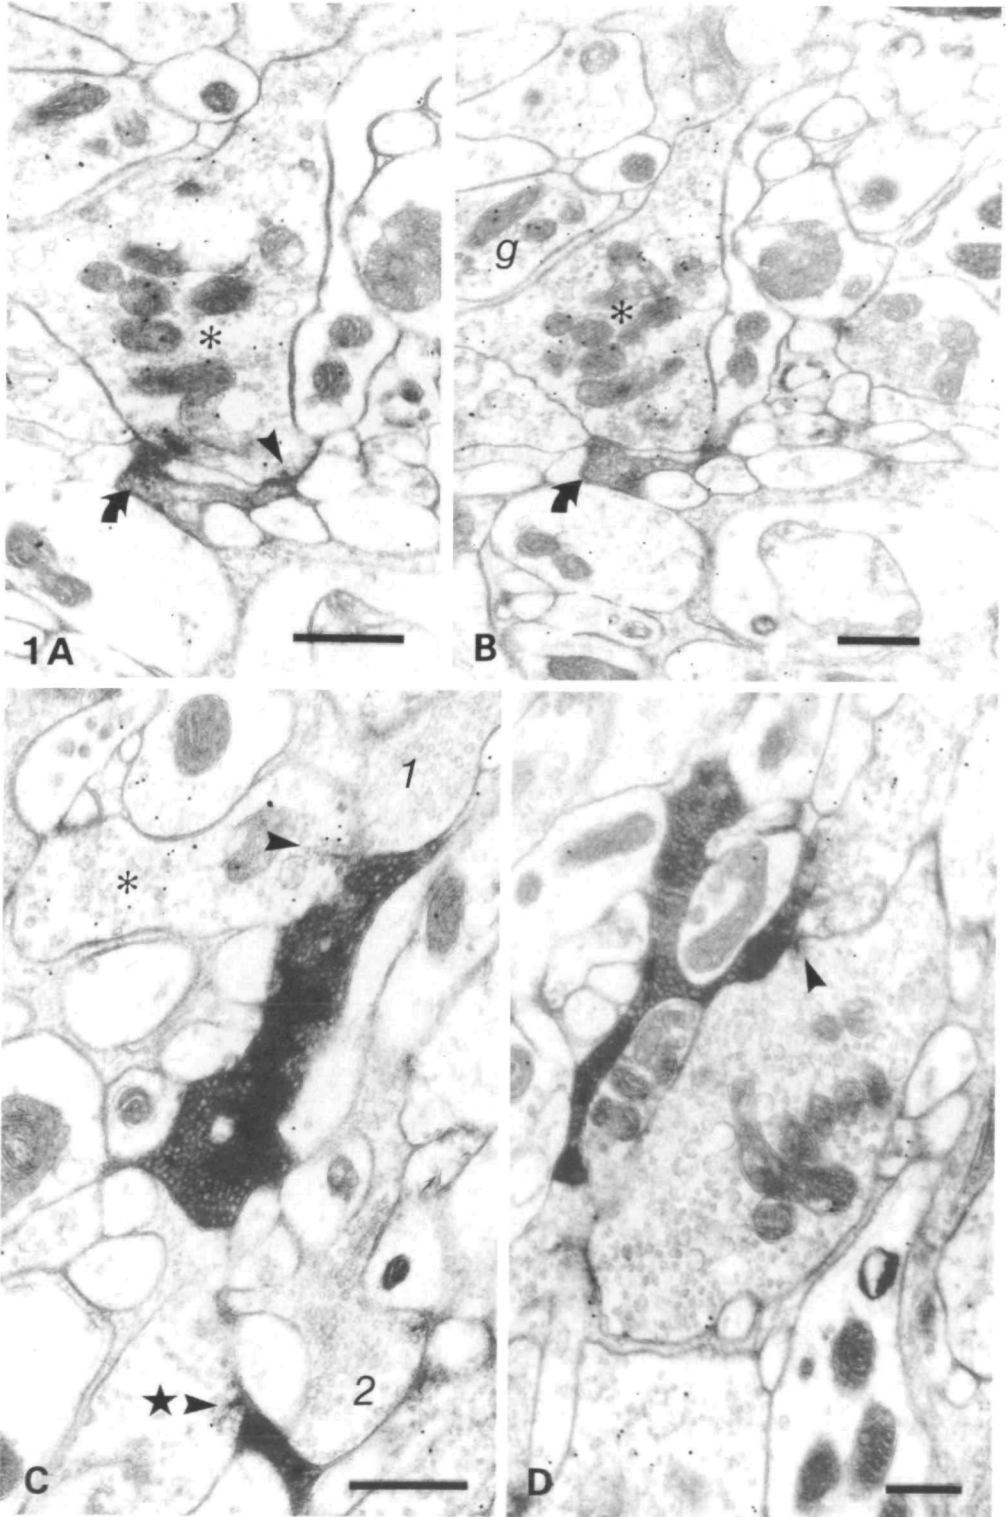

Fig. 1. (A,B). Two non-adjacent sections through a process showing GABA-like immunoreactivity (asterisk) which makes a synapse (arrowhead in A) with an HRP-labelled filiform hair afferent (curved arrow). Note the consistency of gold particle distribution between the two sections. In B, which is at lower power to show the level of background labelling, a second immunoreactive process is visible (g). (C) An HRP-labelled afferent receives an input (arrowhead) from a process immunoreactive for GABA (asterisk) while a smaller afferent branch receives an input (arrowhead) from a non-immunoreactive process with similar synaptic vesicles (star). Note that larger agranular vesicles in two unlabelled processes (1 and 2) show some flattening. (D) An HRP-labelled afferent receiving an input synapse (arrowhead) from an unlabelled process containing larger and rounder agranular vesicles than are seen in labelled processes. Scale bars, 0.5  $\mu$ m.

induced a chloride-dependent hyperpolarization. In an intracellular analysis of presynaptic inhibition between two identified afferents in the first-instar cockroach, Blagburn and Sattelle (1987) observed inhibitory postsynaptic potentials in the afferents. However, in this case the IPSPs had no effect on spike height or synaptic transmission. The effect of one afferent upon the other was due to a depolarization whose reversal potential was probably more positive than  $-35$  mV and therefore unlikely to be due to chloride ions.

This work was supported by a grant from the MRC and a travel award from the Royal Society. I am indebted to Dr E. E. Ball for an invitation to work in his laboratory at the Australian National University and to Dr C. Myers for practical help and support during the project. I am grateful to M. Burrows, G. Laurent and B. Watkins for their helpful comments on the manuscript.

### References

- ALTMAN, J. S., SHAW, M. K. AND TYRER, N. M. (1980). Input synapses onto a sensory neurone revealed by cobalt-electron microscopy. *Brain Res.* **189**, 245–250.
- ATWOOD, H. L. (1976). Organisation and synaptic physiology of crustacean neuromuscular systems. *Prog. Neurobiol.* **7**, 291–391.
- BARBER, R. P., VAUGHN, J. E., SAITO, K. G., MCLAUGHLIN, B. J. AND ROBERTS, E. (1978). GABAergic terminals are presynaptic to primary afferent terminals in the substantia gelatinosa of the rat spinal cord. *Brain Res.* **141**, 35–55.
- BAXTER, D. A. AND BITTNER, G. D. (1981). Intracellular recording from crustacean motor axons during presynaptic inhibition. *Brain Res.* **223**, 422–428.
- BERNARD, J. AND THOMAS, D. (1988). Distribution of glutamate decarboxylase-like immunoreactivity in the sixth abdominal ganglion of the cockroach *Periplaneta americana*. *Cell Tissue Res.* **253**, 129–135.
- BLAGBURN, J. M. AND SATTELLE, D. B. (1987). Presynaptic depolarization mediates presynaptic inhibition at a synapse between an identified mechanosensory neurone and giant interneurone 3 in the first instar cockroach, *Periplaneta americana*. *J. exp. Biol.* **127**, 135–157.
- BOYAN, G. S. (1988). Presynaptic inhibition of identified wind-sensitive afferents in the cercal system of the locust. *J. Neurosci.* **8**, 2748–2757.
- BOYAN, G. S., ASHMAN, S. AND BALL, E. E. (1986). Initiation and modulation of flight by a single giant interneuron in the cercal system of the locust. *Naturwissenschaften* **73**, 272.
- CAMHI, J. L., TOM, W. AND VOLMAN, S. (1978). The escape behavior of the cockroach *Periplaneta americana*. II. Detection of natural predators by air displacement. *J. comp. Physiol.* **128**, 203–212.

- ECCLES, J. C. (1964). *The Physiology of Synapses*. Berlin: Springer-Verlag.
- HAMORI, J. AND TAKACS, J. (1989). Two types of GABA-containing axon terminals in the cerebellar glomeruli of the cat: an immunogold-EM study. *Expl Brain Res.* **74**, 471-479.
- HUBER, F. (1965). Brain controlled behaviour in Orthopterans. In *The Physiology of the Insect Nervous System* (ed. J. E. Treherne and J. W. L. Beament), pp. 233-246. London: Academic Press.
- HUE, B. AND CALLEC, J. J. (1983). Presynaptic inhibition in the cercal-afferent giant-interneurone synapses of the cockroach, *Periplaneta americana* L. *J. Insect Physiol.* **29**, 741-748.
- JACOBS, G. A., REDFERN, C. AND MILLER, J. P. (1985). Identification and characterisation of inhibitory inputs in the cercal afferent system. *Neurosci. Abstr.* **11**, 164.
- KÄMPER, G. (1984). Abdominal ascending interneurons in crickets: Responses to sound at the 30-Hz calling song frequency. *J. comp. Physiol.* **155**, 507-520.
- KENNEDY, D., MCVITTIE, J., CALABRESE, R., FRICKE, R. A., CRAELIUS, W. AND CHIAPELLA, P. (1980). Inhibition of mechanosensory interneurons in the crayfish. I. Presynaptic inhibition from giant fibres. *J. Neurophysiol.* **43**, 1495-1509.
- KLEIN, M. AND KANDEL, E. R. (1980). Mechanism of  $Ca^{++}$  current modulation underlying presynaptic facilitation and behavioural sensitisation in *Aplysia*. *Proc. natn. Acad. Sci. U.S.A.* **77**, 6912-6916.
- LEVINE, R. B. AND MURPHEY, R. K. (1980). Pre- and postsynaptic inhibition of identified giant interneurons in the cricket (*Acheta domesticus*). *J. comp. Physiol.* **135**, 269-282.
- MAXWELL, D. J., BANNATYNE, B. A., FYFFE, R. E. W. AND BROWN, A. G. (1982). The ultrastructure of hair follicle afferent fibre terminations in the spinal cord of the cat. *J. Neurocytol.* **11**, 571-582.
- MAXWELL, D. J. AND NOBLE, R. (1987). Relationships between hair-follicle afferent terminations and glutamic acid decarboxylase-containing boutons in the cat's spinal cord. *Brain Res.* **408**, 308-312.
- MILEDI, R. AND SLATER, C. R. (1966). The action of calcium on neuronal synapses in the squid. *J. Physiol., Lond.* **184**, 473-498.
- NICHOLL, R. A. AND ALGER, B. E. (1979). Presynaptic inhibition: transmitter and ionic mechanisms. *Int. Rev. Neurobiol.* **21**, 217-258.
- PLUMMER, M. R. AND CAMHI, J. M. (1981). Discrimination of sensory stimulation from noise in the escape system of the cockroach: the role of wind acceleration. *J. comp. Physiol.* **142**, 347-357.
- RALSTON, H. J., LIGHT, A. R., RALSTON, D. D. AND PERL, E. R. (1984). Morphology and synaptic relationships of physiologically identified low-threshold dorsal root axons stained with intra-axonal horseradish peroxidase in the cat and monkey. *J. Neurophysiol.* **51**, 777-792.
- SHANKLAND, M. AND GOODMAN, C. S. (1982). The development of the dendritic branching pattern of the medial giant interneuron in the locust. *Devl Biol.* **92**, 507-522.
- SHAPIRO, E., CASTELLUCCI, V. F. AND KANDEL, E. R. (1980). Presynaptic membrane potential affects transmitter release in an identified neuron in *Aplysia* by modulating the  $Ca^{++}$  and  $K^{+}$  currents. *Proc. natn. Acad. Sci. U.S.A.* **77**, 629-633.
- TISDALE, A. D. AND NAKAJIMA, Y. (1976). Fine structure of synaptic vesicles in two types of nerve terminals in crayfish stretch receptor organs: influence of fixation methods. *J. comp. Neurol.* **165**, 369-386.
- UCHIZONO, K. (1965). Characteristics of excitatory and inhibitory synapses in the central nervous system of the cat. *Nature, Lond.* **207**, 642-643.
- UCHIZONO, K. (1967). Inhibitory synapses on the stretch receptor neurones of the crayfish. *Nature, Lond.* **214**, 833-834.
- WATSON, A. H. D. (1988). Antibodies against GABA and glutamate label neurones with morphologically distinct synaptic vesicles in locust central nervous system. *Neuroscience* **26**, 33-44.
- WATSON, A. H. D. AND BURROWS, M. (1981). Input and output synapses on identified motor neurones of a locust revealed by the intracellular injection of Horseradish Peroxidase. *Cell Tissue Res.* **215**, 325-332.

- WATSON, A. H. D. AND PFLÜGER, H.-J. (1984). The ultrastructure of prosternal sensory hair afferents within the locust central nervous system. *Neuroscience* **11**, 269–279.
- WATSON, A. H. D. AND PFLÜGER, H.-J. (1988). The distribution of GABA-like immunoreactivity in relation to ganglion structure in the abdominal nerve cord of the locust (*Schistocerca gregaria*). *Cell Tissue Res.* **249**, 391–402.
